1 Functional Aspects of the Eustachian Tube by Means of 3D-Modeling

2

3 Author 1: Schuon Robert, Dr., MD\*

4 Department of Otorhinolaryngology, Hannover Medical School, Germany

5

6 Author 2: Schwarzensteiner, Josef,

7 Department of Otorhinolaryngology, Hannover Medical School, Germany

8

9 Author 3: Paasche, Gerrit, Dr.

10 Department of Otorhinolaryngology, Hannover Medical School, Germany

11 Hearing4all Cluster of Excellence, Hannover Medical School, Germany

12

13 Author 4: Lenarz Thomas, Univ.-Prof., Dr.

14 Department of Otorhinolaryngology, Hannover Medical School, Germany

15 Hearing4all Cluster of Excellence, Hannover Medical School, Germany

16

17 Author 5: John, Samuel

18 HörSys GmbH, Hannover, Germany

19

20 Author responsible for correspondence and proofs: **Robert Schuon** (Author 1)

21 [Email: schuon.robert@mh-hannover.de](mailto:schuon.robert@mh-hannover.de)

22 [Phone: 00491796857765](tel:00491796857765)

**3D Eustachian Tube**, Schuon R., et al.,

23 **Key words**

24 Eustachian tube, cone-beam computed tomography, histology, modeling, middle ear

25 ventilation, three-dimensional imaging

26 **Abstract**

27 The extent of dysfunction of the Eustachian tube (ET) is relevant in understanding the  
28 pathogenesis of secondary otological diseases such as acute or chronic otitis media. The  
29 underlying mechanism of ET dysfunction remains poorly understood except for an apparent  
30 genesis such as a nasopharyngeal tumor or cleft palate. To better describe the ET, its  
31 functional anatomy, and the biomechanical valve mechanism and subsequent development of  
32 diagnostic and interventional tools, a three-dimensional model based on thin-layer histology  
33 was created from an ET in this study. Blackface sheep was chosen as a donor. The 3-D model  
34 was generated by the coherent alignment of the sections. It was then compared with the cone-  
35 beam computed tomography dataset of the complete embedded specimen taken before slicing.  
36 The model shows the topographic relation of the individual components, such as the bone and  
37 cartilage, the muscles and connective tissue, as well as the lining epithelium with the lumen. It  
38 indicates a limited spiraling rotation of the cartilaginous tube over its length and relevant  
39 positional relationships of the tensor and levator veli palatine muscles.

## 40 Introduction

41 Inadequate function of the Eustachian tube (ET) causes middle ear ventilation disorders. In an  
42 epidemiologically relevant disease with 2 million patients in the US every year, further  
43 research into its pathogenesis is important<sup>1</sup>. The ET is a biomechanical valve between the  
44 nasopharynx and the middle ear. Physiologically, it controls the passive adaptation of the  
45 middle ear air pressure to the ambient air pressure primarily via direct muscular actions of the  
46 soft palate. In the closed state it protects the middle ear<sup>2</sup>. Form and function are mutually  
47 dependent, and this is evident in functional anatomy and biomechanics.

48 In some cases, pathogenesis is distinct. For example, adenoid vegetations and other benign  
49 lesions<sup>3</sup> but also nasopharyngeal carcinoma and other malignant entities can additionally  
50 increase the ET opening resistance by local pressure on the cartilaginous part of the ET<sup>4</sup> or  
51 displacement of the entrance, by structural ingrowth with destruction, or neuromuscular  
52 impairment<sup>3</sup>. Further, a cleft palate formation<sup>4-7</sup> as a result of an embryonic malformation in  
53 the palate area usually leads to a disturbed muscular action, such that the ET cannot open  
54 when yawning or swallowing to compensate for pressure differences between the tympanum  
55 and ambient air pressure. Other obvious reasons for tubal dysfunction can be impaired nasal  
56 breathing due to enlarged nasal conchae, septal deviation or chronic sinusitis<sup>8-10</sup>, which can be  
57 detected endoscopically or by imaging. But in many cases, the clinician has not such apparent  
58 local findings.

59 Due to its eminent clinical relevance, the ET has been investigated in various other studies for  
60 descriptive issues. Macro-<sup>11-14</sup> and microscopic anatomical studies<sup>15</sup> were carried out  
61 describing the compartments involved down to the cellular level. Endoscopic studies enable  
62 the processing of functional questions in vivo, partly coupled with electromyographic,  
63 acoustic, or pneumatic measurements<sup>16-20</sup>. Imaging procedures without dissecting procedures  
64 increasingly provide insight into the anatomy and physiology of the tube<sup>21-23</sup>. Tomographic

**3D Eustachian Tube**, Schuon R., et al.,

65 multiplanar imaging is especially the subject of static and dynamic functional studies of the  
66 ET<sup>24-26</sup>. In addition, optical coherence tomography might present new possibilities for three  
67 dimensional imaging<sup>27</sup>. Also, three-dimensional modeling<sup>28, 29</sup> and simulations such as finite  
68 element methods<sup>7, 30, 31</sup> have been applied. Furthermore, other endoluminal diagnostics<sup>32, 33</sup>  
69 and therapies of the ET such as balloon dilatation<sup>34-36</sup> and stenting<sup>37, 38</sup> of the ET are  
70 becoming increasingly important in clinic and research. The studies complement and support  
71 each other in different ways. Although a large number of studies on the ET are available, a  
72 detailed and comprehensive functional description based on the anatomic structures is not yet  
73 available.

74 A detailed three-dimensional microanatomy study was conducted in the present study to  
75 better understand these functional aspects. The part controlling the function of the ET is the  
76 cartilaginous part, which mainly consists of a lining of respiratory mucous membrane of the  
77 lumen, supporting cartilage, Ostmann fat pad (OFP), musculature as well as connective tissue  
78 attachment sites and positional relationships between each other. The muscular interaction  
79 between the fixed points of the hard palate with the pterygoid process and the posterior  
80 attachment to the base of the skull via the soft palate is essential, and is supplemented and  
81 supported by actions of jaw movement and tongue-pharynx activity. The soft palate as a  
82 posterior continuation of the hard palate is formed in a mirror-symmetrical construction<sup>39, 40</sup>,  
83 an upper muscle ring towards the base of the skull and a lower muscle ring towards the  
84 tongue and pharynx sidewall. The essential muscles of the soft palate involved in ET opening  
85 are the tensor veli palatini muscle (TVPM) and the levator veli palatini muscle (LVPM), which  
86 act on elements of the ET via divergent force vectors. Locally adjacent muscles, such as the  
87 tensor tympani muscle with close positional relationship parallel to the bony part of the ET,  
88 are insignificant for tube function<sup>41</sup>.

89 To functionally decode the complex arrangement and, if necessary, to handle it for simulation  
90 purposes, two essential prerequisites are required: (1) high-resolution imaging to differentiate

**3D Eustachian Tube**, Schuon R., et al.,

91 the individual compartments clearly and (2) a consistent and quantitatively evaluable image  
92 data set in three dimensions. To date, transmitted light microscopy of thin sections is the gold  
93 standard for histological examination in pathology. Here, quantitative analyses are already  
94 established by digitizing sectional images<sup>38</sup>. Generating a three-dimensional volume model  
95 from two-dimensional sections (in the sense of the slices) requires a relational assignment of  
96 the individual sections. This proper allocation requires data of the correct spacing on the  
97 different sections. Also, it is essential to stack the digitized image sections according to the  
98 axis to prevent systematic errors due to torsion<sup>42</sup>. Blackface sheep were chosen as an animal  
99 model for this study due to the relative similarity of their ET to the human ET<sup>43</sup>. A  
100 quantitatively evaluable three-dimensional model of the ET and its functional elements in  
101 qualitative spatial conformation might be an essential element in understanding the valve  
102 mechanism and the subsequent development of new therapies.

103

## 104 Material and Methods

### 105 Ethics approval

106 The State Office for Consumer Protection and Food Safety, Dept. of Animal Welfare  
107 approved experiments with blackface sheep including the use of ET for histological  
108 evaluations following German and European animal welfare legislation under the numbers  
109 13/1089 and 13/1283.

110

### 111 Sample collection and preparation

112 An unscathed, untreated right ET of a fresh carcass of a blackface sheep (no. 211) from the  
113 above-mentioned study 13/1283 was dissected. Preparation of the tissue followed the protocol  
114 provided by Pohl et al.<sup>36</sup>. Briefly, after dissection, the specimen was fixed in formalin (3.5 %,  
115 pH 7.4; C. Roth, Karlsruhe, Germany) for two weeks. In contrast to the earlier published  
116 protocol<sup>38</sup>, before embedding, three Sterican<sup>®</sup> standard needles (0.9 mm x 70 mm; B. Braun  
117 Melsungen AG, Melsungen, Germany) were placed by hand in the soft tissue as parallel as  
118 possible to the course of the tube as landmarks for the later reconstruction of the sample. Care  
119 was taken to remain with the needles outside the cartilaginous ET. The tissue block was  
120 dehydrated by using an increasing ethanol series (70%, 80%, 90%, 100%; Merck KGaA,  
121 Darmstadt, Germany) and embedded in methyl methacrylate (MMA; Merck). The received  
122 block was additionally referenced for further control with the milling of three opposing  
123 grooves.

124

### 125 Series cutting, staining, and digitization

126 Due to the height of the block with the embedded ET, it had to be divided into two blocks of  
127 half the height for cutting with the hole saw (Leica - SP1600<sup>®</sup>, Leica Biosystems Nussloch  
128 GmbH, Nussloch, Germany). Cone-beam computed tomography (CBCT) was performed with

### 3D Eustachian Tube, Schuon R., et al.,

129 both halves (XORAN xCAT<sup>®</sup>, Xoran technologies, MI, USA, ENT scan, high-resolution  
130 0.3 mm). Subsequently, 100 sections of 33  $\mu\text{m}$  thickness were produced with the hole saw at  
131 equal distances of 330  $\mu\text{m}$  (the thickness of the sawing blade). After each section, the  
132 remaining thickness of the respective block was measured at the three grooves. Two sections  
133 were lost due to mounting of the blocks on the sample holder (Fig. 1a). Sections were stained  
134 with methylene blue (Loeffler's Methylene blue solution; Merck) for 45 s at 80 °C and  
135 alizarin red (Alizarin red S staining solution; Merck) for 1.5 min. Digitization of the sections  
136 was performed using a digital microscope (Biorevo BZ-9000<sup>®</sup>, KEYENCE, Osaka, Japan) at  
137 2x magnification and a resolution of 3094 x 4094 pixels.

138

#### 139 Data preprocessing and image stacking

140 For each section, electronic white balancing was performed using the open source software  
141 ImageJ (release 1.49m). For the data preprocessing, the positions of the three cannulas, placed  
142 approximately parallel to the tube axis, were marked in each section for fiducial registration.  
143 Additionally, compartments of histological structures were segmented such that musculature,  
144 cartilage, mucosa, bone, and OFP were individually defined in each section.

145 To generate a 3D-model of the ET, all stained and segmented sections were serially merged  
146 into a three-dimensional dataset in stereo lithography, or surface tessellation/triangulation  
147 language-format (STL-format) and arranged based on the thickness of the individual parallel  
148 sections (33  $\mu\text{m}$ ) and the thickness of the saw blade (330  $\mu\text{m}$ ) as spacing between the  
149 individual sections (z-axis). The open source software platform 3DSlicer<sup>®</sup>  
150 (<https://www.slicer.org/>, release 4.4) was used to work with this dataset. The orientation of  
151 the first section of each of the two blocks was corrected due to the mounting in the hole saw.  
152 Next, the axial alignment of the histological images was carried out utilizing the position of  
153 the three cannulas (x, y-axis) (Fig. 1 b) in each image. The stacked sections were then  
154 registered with the CBCT scans. The positions of the cannulas and the grooves were used as



**3D Eustachian Tube**, Schuon R., et al.,

155 landmarks for the stacking and for the registration. To achieve best fits between both datasets  
156 and least deviations from linearity of cannulas and grooves, individual sections had to be  
157 slightly tilted to account for not perfect parallelism of the sections stemming from the sawing  
158 process.

## 159 Results

160 The segmented sections could be stacked into a consistent volume data set (Fig. 2) that  
161 allowed for multiplanar imaging and quantitative analysis. The thin section preparation and  
162 staining (compare Fig. 2B) allowed for proper differentiation and segmentation of the  
163 individual compartments in the different sections. Due to this segmentation, the different  
164 compartments could be extracted and visualized from the 3D model of the ET (Fig. 3).  
165 Sometimes compartments appeared partly perforated. After checking the situation in adjacent  
166 sections these were, where appropriate, combined to form a single functional unit. The  
167 registration of the three-dimensional histological data set with the CBCT DICOM data set  
168 shows good agreement throughout the whole stack (Fig. 4). The close relationship between  
169 the cartilaginous ET and the bony base of the skull can be seen together with the course in the  
170 sulcus tubarius as well as the entry into the bony ET (Fig. 4B). The positional alignment of  
171 the thin slice sections shows relational regularities, such as the spatial configuration of the  
172 cartilaginous parts of the ET itself and the positional relationship to the crucial muscles,  
173 TVPM, and LVPM. The quantitative analysis of the tube cartilage, lumen and OFP is  
174 provided in Fig. 5. The cross-sectional area of the tube cartilage remains largely constant over  
175 the area under consideration. However, the circumference of the tube cartilage decreases  
176 abruptly before entering the isthmus region of the ET and posterior to the area where TVPM  
177 and LVPM are connected to the cartilage, bony or connective tissue. The measured lumen of  
178 the ET is in most parts small with a large circumference indicating a more or less closed tube.  
179 Only at the pharyngeal orifice there was some opening detected. Close to the isthmus, the area  
180 of the lumen increased, and the circumference decreased indicating an open lumen at the  
181 isthmus and further laterally. Area and circumference of the OFP decreased more or less  
182 continuously towards the isthmus.

**3D Eustachian Tube**, Schuon R., et al.,

183 The LVPM undercuts the lower edge of the medial tubal cartilage (Fig. 6). The course of the  
184 LVPM in relation to the inferior margin of the ET cartilage is scissor-like from posterior to  
185 anterior is directed towards the middle. In cross-view the muscular shape of LVPM is wedge-  
186 like. The TVPM inserts in direction to the middle ear in the lateral arm of the ET cartilage, as  
187 well as the skull base. The tube cartilage, when oriented on the long medial arm, shows a  
188 torsion from the middle ear to the pharynx of 38° (Fig. 7).

## 189 Discussion

190 A three-dimensional model of ET of blackface sheep was created using the digitization of  
191 large-format histological sections and their spatially correct stacking. Geometrically, the  
192 model corresponds to the CBCT produced before sectioning. The confirmed quantitative  
193 evaluation is therefore permissible. The segmentation of the functional entities, such as  
194 muscles, cartilage, bone, and connective tissue, allows the three-dimensional visualization as  
195 well as measurement of the different compartments and their relationships. The connection of  
196 the tubal cartilage with the bony skull base with its course in the sulcus tubarius, and the  
197 transition into the bony section of the ET can be shown topographically (compare Fig. 4B). In  
198 other anatomical studies, a quantitative analysis of entities has also been performed but the  
199 relational assignment was based on landmarks such as the characteristic paisley-shape of the  
200 cartilage in cross-sections<sup>11</sup>. This results in the image of a more or less uniform canal in a  
201 three-dimensional projection. With our model, a rotation of the tube cartilage is evident,  
202 which we use as a basis for hypothesis (Fig. 7). Early studies describe the hourglass-shaped  
203 configuration of the ET with the extension to the pharyngeal orifice of the lumen<sup>44</sup>. This can  
204 be confirmed by the results of the current study in sheep and can also be supplemented by the  
205 specification of the shape of the tube cartilage. A decreasing circumference of the cartilage,  
206 with a cross-section that remains uniform at the same time, shows an increasingly compact  
207 shape of the cartilage in the direction to the isthmus and the bony part of the ET. The more  
208 compact shape of the cartilage towards the middle of the ET suggests an increased bending  
209 stiffness compared to the thinner cartilage formation in the direction of the pharyngeal orifice.  
210 The structural mechanism of the ET seems functionally similar to the statics of hollow  
211 cylinders cantilevered perpendicular to the ground to withstand lateral forces, comparably  
212 with modern skyscrapers.

**3D Eustachian Tube**, Schuon R., et al.,

213 The small open lumen and large circumference indicates that the cartilaginous tube is largely  
214 closed coming from the pharyngeal orifice. In the region where the cartilage becomes more  
215 compact, the circumference of the lumen also gets smaller but without affecting the area as  
216 seen in cross sections. Only when approaching the isthmus, the area of the lumen increases  
217 again. As this goes along with the smallest circumference it is taken as indicator for a small  
218 but permanently open lumen. The axial diagram of the course corresponds to the examination  
219 of the ET at rest in the OCT<sup>27</sup>. The large circumference is caused by the longitudinal mucosal  
220 folds<sup>45</sup> along the tube axis, which are predominantly posterior to the torus tubarius up to the  
221 transition area.<sup>13</sup>

222 A detailed macroscopical morphological study of the muscular entity, such as the TVPM,  
223 inevitably requires the removal of other relevant structures involved in dissection, such as the  
224 LVPM<sup>12</sup>. From a surgical point of view, this is certainly valuable, but this can only contribute  
225 to a limited biomechanical understanding. The difficulty of microscopic morphological  
226 studies using parallel histological section series which allow axial image rotation by  
227 referencing individual landmarks, such as the typical paisley-shaped cartilage axis in ET, can  
228 be a methodical source of error. Different positions of the LVPM to the medial tube cartilage  
229 may have arisen because the rotated position of the respective incision in the ET course led to  
230 a different position of the LVPM<sup>46</sup>. In this study, it was shown that the cartilage of the ET in  
231 the direction from the bony portion to the soft palate not only forms a uniform groove-like  
232 structure from the back craniolaterally to the front caudomedially, but is also, in this direction,  
233 rotated slightly helical inwards around its own axis. Functionally, this is relevant because the  
234 LVPM is located in the lifting portion of the soft palate<sup>20</sup> with its wedge-shaped profile caudal  
235 lateral of the lateral cartilage and thus not only raises this but also performs a rotation of the  
236 lower end towards the sagittal plane. The wedge-shaped muscle part in the cross-section of  
237 the LVPM is located near the pharyngeal orifice. In the area of the bony origin in the skull  
238 base near the isthmus, the muscle belly is rounded. Further studies with human specimen are

**3D Eustachian Tube**, Schuon R., et al.,

239 necessary to check this muscular configuration; in different publications, the muscle belly is  
240 always described as rounded in cross-section<sup>13, 46</sup>. The principle of lever forces here might  
241 have a significant influence on effectiveness. The larger distance from lumen and LVPM to  
242 TVPM has already been described as significant in the adult population compared to  
243 children<sup>29</sup>. At the approximately simultaneous activity of the TVPM, which approaches the  
244 over the pivot point, the hamulus, proceeding from the caudal and lateral direction directly to  
245 the short arm of the ET cartilage, an impulse opposite to the LVPM might arise. A fascial  
246 suspension of the ET at the overlying skull base apparently provides for a further axial  
247 location stabilization of the ET. This explains the videoendoscopically described mechanism  
248 of rotation of the medial lamina and fixation of the lateral lamella<sup>17</sup>. Electromyographic  
249 studies of LVPM and TVPM show an initial and longer activation of the LVPM and  
250 secondary activation of the TVPM<sup>47</sup>. This might result in the following mechanism. An  
251 earlier further inward torsion of the medial cartilaginous lamina by the LVPM is followed by  
252 secondary activation of the TVPM which results in a contrary momentum of the short  
253 cartilaginous lamina, resulting in a swing open momentum of the cartilaginous groove. Even  
254 though the TVPM is commonly referred to as the *dilator tubae*, a relevant proportion of the  
255 LVPM might be entirely attributable to the biomechanical hypothesis described here. This  
256 was also confirmed by electromyographic analyzes<sup>18</sup>. In a study, an opening movement of the  
257 ET was assumed, which was triggered by an isometric contraction of the LVPM with a  
258 displacement of the medial cartilage<sup>46</sup> of the tube. The position of the LVPM in the  
259 cartilaginous tube is essentially dependent on the movement of the muscular double ring,  
260 which the ET moves from the hard palate back up towards the base of the skull and back  
261 down towards the tongue and throat. This results in different moments of influence on the ET.  
262 Typically, the adjustment of the middle ear air pressure takes place passively during  
263 swallowing. The latter results in a lifting movement of the soft palate<sup>48</sup>. This in turn leads to a  
264 scissor-like swing in of LVPM into the medial cartilage of the tube. The axis of rotation of

**3D Eustachian Tube**, Schuon R., et al.,

265 this movement lies in the bony attachment point of the LVPM laterally and just below the  
266 tube. The LVPM undercuts the medial cartilage of the tube. The spirally twisted ET cartilage  
267 seems to adapt in a spiral rotation this upward movement of LVPM harmoniously. There is  
268 corresponding compliance to the movement of the mucous membrane by primary elasticity  
269 and the clear surface surplus in the closed resting position by folding. In addition to the  
270 LVPM-mediated opening movement of the medial arm, the j-folded ET cartilage is spread by  
271 the TVPM-mediated counter movement of the short arm in a lateral direction.

272 An even more detailed segmentation of the tissues, for example, the goblet cells<sup>49</sup>, could be  
273 used in further studies to clarify questions about factors of a possible additional mechanical  
274 etiology of chronic ET dysfunction by obstruction.

275 In this study, the OFP is presented in three dimensions, allowing an analysis of the  
276 topographic anatomy embedded in the overall structure. Previous analyses showed a careful  
277 evaluation in the axial layer only<sup>15</sup>. This study, which includes a three-dimensional modeling,  
278 allows more realistic modeling and also to take a further step towards more detailed analyzes,  
279 e.g. finite element methods<sup>15</sup> or mechanical experiments<sup>50</sup>. Based on the findings in the  
280 present study, we may speculate that in order to adjust the air pressure in the middle ear to  
281 ambient air pressure, the muscular activity in interaction with bony and cartilaginous  
282 supporting tissue structures and soft tissue structures, which like the OFP, contribute to the  
283 sealed tube, is in principle comparable to a hydraulic valve.

284 All results presented here were obtained from an animal model. We can refer to the basic  
285 structural similarity of the anatomy<sup>43</sup> but for a translation of the results and conclusions to  
286 humans, human Eustachian tubes should be evaluated in a comparable manner. An extended  
287 investigation with possibly other staining methods for a better representation of fascial  
288 structures within the ET could also provide further insights into functional aspects, e.g.  
289 principles of tensegrity<sup>51</sup>.

291 Summary

- 292       • An ex-vivo study was conducted to build a 3D-model of the Eustachian tube of black  
293       face sheep.
- 294       • One consistent Eustachian tube of a black face sheep cadaver was first cut into  
295       histological thin-film sections, digitalized and the images stacked using fiducial  
296       markers which cut through all sections. The resulting 3D model was then registered to  
297       the CBCT scans of the specimen.
- 298       • The segmentation of the individual compartments allowed a quantitative analysis. This  
299       contributes to improvements for planning of therapeutic approaches directly at the  
300       Eustachian tube, such as balloon tuboplasty or stenting.
- 301       • The cartilaginous part shows a spiral course in the axial direction. In connection with  
302       the course of LVPM and TVPM, this results in our hypothesis for a functional model  
303       regarding the mechanism of air pressure equilibration.



**3D Eustachian Tube**, Schuon R., et al.,

304 **Acknowledgments**

305 This study was supported by BMBF RESPONSE – partnership for innovation in implant  
306 technology, FKZ 03ZZ0902E.

307 References

- 308 1 Vila PM, Thomas T, Liu C, Poe D, Shin JJ. The Burden and Epidemiology of Eustachian  
309 Tube Dysfunction in Adults. *Otolaryngology--head and neck surgery : official journal of*  
310 *American Academy of Otolaryngology-Head and Neck Surgery* 2017;**156**(2):278-84
- 311 2 Bluestone CD, Hebda PA, Alper CM, Sando I, Buchman CA, Stangerup SE, et al. Recent  
312 advances in otitis media. 2. Eustachian tube, middle ear, and mastoid anatomy;  
313 physiology, pathophysiology, and pathogenesis. *Ann Otol Rhinol Laryngol Suppl*  
314 2005;**194**:16-30
- 315 3 Su C-Y, Hsu S-P, Lui C-C. Computed Tomography, Magnetic Resonance Imaging, and  
316 Electromyographic Studies of Tensor Veli Palatini Muscles in Patients With  
317 Nasopharyngeal Carcinoma. *Laryngoscope* 1993;**103**:6
- 318 4 Heidsieck DS, Smarius BJ, Oomen KP, Breugem CC. The role of the tensor veli palatini  
319 muscle in the development of cleft palate-associated middle ear problems. *Clin Oral*  
320 *Investig* 2016;**20**(7):1389-401
- 321 5 Bluestone CD, Beery QC, Cantekin EI, Paradise JL. Eustachian tube ventilatory function  
322 in relation to cleft palate. *Ann Otol Rhinol Laryngol* 1975;**84**(3 Pt 1):333-8
- 323 6 Matsune S, Sando I, Takahashi H. Abnormalities of lateral cartilaginous lamina and  
324 lumen of eustachian tube in cases of cleft palate. *Ann Otol Rhinol Laryngol*  
325 1991;**100**(11):909-13
- 326 7 Sheer FJ, Swarts JD, Ghadiali SN. Three-dimensional finite element analysis of  
327 Eustachian tube function under normal and pathological conditions. *Med Eng Phys*  
328 2012;**34**(5):605-16
- 329 8 Salvinelli F, Casale M, Trivelli M, Greco F. Nasal and hearing impairment: are they  
330 linked? *Medical Hypotheses* 2002;**58**(2):141-3
- 331 9 Skoner DP, Doyle WJ, Chamovitz AH, Fireman P. Eustachian Tube Obstruction After  
332 Intranasal Challenge With House Dust Mite. *Archives of Otolaryngology-Head & Neck*  
333 *Surgery* 1986;**112**(8):840-2
- 334 10 Bonding P, Tos M. Middle Ear Pressure During Brief Pathological Conditions of the  
335 Nose and Throat. *Acta Oto-Laryngologica* 1981;**92**(1-6):63-9
- 336 11 Maheshwar AA, Kim EY, Pensak ML, Keller JT. Roof of the parapharyngeal space:  
337 defining its boundaries and clinical implications. *Ann Otol Rhinol Laryngol*  
338 2004;**113**(4):283-8

- 339 12 Abe M, Murakami G, Noguchi M, Kitamura S, Shimada K, Kohama GI. Variations in the  
340 tensor veli palatini muscle with special reference to its origin and insertion. *Cleft Palate*  
341 *Craniofac J* 2004;**41**(5):474-84
- 342 13 Proctor B. Embryology and anatomy of the eustachian tube. *Arch Otolaryngol*  
343 1967;**86**(5):503-14
- 344 14 Komune N, Matsuo S, Miki K, Akagi Y, Kurogi R, Iihara K, et al. Surgical Anatomy of the  
345 Eustachian Tube for Endoscopic Transnasal Skull Base Surgery: A Cadaveric and  
346 Radiologic Study. *World Neurosurg* 2018
- 347 15 Aoki H, Sando I, Takahashi H. Anatomic relationships between Ostmann's fatty tissue  
348 and eustachian tube. *Ann Otol Rhinol Laryngol* 1994;**103**(3):211-4
- 349 16 Swartz JD, Alper CM, Luntz M, Bluestone CD, Doyle WJ, Ghadiali SN, et al. Panel 2:  
350 Eustachian tube, middle ear, and mastoid--anatomy, physiology, pathophysiology, and  
351 pathogenesis. *Otolaryngology--head and neck surgery : official journal of American*  
352 *Academy of Otolaryngology-Head and Neck Surgery* 2013;**148**(4 Suppl):E26-36
- 353 17 Alper CM, Teixeira MS, Swartz JD, Doyle WJ. Quantitative description of eustachian  
354 tube movements during swallowing as visualized by transnasal videoendoscopy. *JAMA*  
355 *otolaryngology-- head & neck surgery* 2015;**141**(2):160-8
- 356 18 Chang KH, Jun BC, Jeon EJ, Park YS. Functional evaluation of paratubal muscles using  
357 electromyography in patients with chronic unilateral tubal dysfunction. *European*  
358 *archives of oto-rhino-laryngology : official journal of the European Federation of Oto-*  
359 *Rhino-Laryngological Societies* 2013;**270**(4):1217-21
- 360 19 Songu M, Aslan A, Unlu HH, Celik O. Neural control of eustachian tube function.  
361 *Laryngoscope* 2009;**119**(6):1198-202
- 362 20 Hamlet SL, Momiyama Y. Velar activity and Timing of Eustachian Tube Function in  
363 Swallowing. *Dysphagia* 1992;**7**:13
- 364 21 Ishijima K, Sando I, Miura M, Balaban CD, Takasaki K, Sudo M. Postnatal development  
365 of static volume of the eustachian tube lumen. A computer-aided three-dimensional  
366 reconstruction and measurement study. *Ann Otol Rhinol Laryngol* 2002;**111**(9):832-5
- 367 22 Tarabichi M, Kapadia M. The Role of Transtympanic Dilatation of the Eustachian Tube  
368 During Chronic Ear Surgery. *Otolaryngologic Clinics of North America* 2016;**49**(5):1149-  
369 62
- 370 23 Tarabichi M, Kapadia M. Preoperative and Intraoperative Evaluation of the  
371 Eustachian Tube in Chronic Ear Surgery. *Otolaryngol Clin North Am* 2016;**49**(5):1135-47

**3D Eustachian Tube**, Schuon R., et al.,

- 372 24 Alper CM, Rath TJ, Teixeira MS, Swarts JD. A Novel Imaging Method for the  
373 Cartilaginous Eustachian Tube Lumen: Computerized Tomography During the Forced  
374 Response Test. *Ann Otol Rhinol Laryngol* 2017;3489417740363
- 375 25 Takasaki K, Takahashi H, Miyamoto I, Yoshida H, Yamamoto-Fukuda T, Enatsu K, et  
376 al. Measurement of angle and length of the eustachian tube on computed tomography  
377 using the multiplanar reconstruction technique. *Laryngoscope* 2007;**117**(7):1251-4
- 378 26 Oshima T, Kikuchi T, Hori Y, Kawase T, Kobayashi T. Magnetic resonance imaging of  
379 the eustachian tube cartilage. *Acta Otolaryngol* 2008;**128**(5):510-4
- 380 27 Schuon R, Mrevlje B, Vollmar B, Lenarz T, Paasche G. Intraluminal three-dimensional  
381 optical coherence tomography - a tool for imaging of the Eustachian tube? *J Laryngol*  
382 *Otol* 2019:1-8
- 383 28 Mori K, Naito Y, Hirono Y, Honjo I. Three-dimensional computer graphics of the  
384 eustachian tube. *American journal of otolaryngology* 1987;**8**(4):211-3
- 385 29 Sadler-Kimes D, Siegel MI, Todhunter JS. Age-related morphologic differences in the  
386 components of the eustachian tube/middle ear system. *Ann Otol Rhinol Laryngol*  
387 1989;**98**(11):854-8
- 388 30 Ghadiali SN, Banks J, Swarts JD. Finite element analysis of active Eustachian tube  
389 function. *J Appl Physiol (1985)* 2004;**97**(2):648-54
- 390 31 Malik JE, Swarts JD, Ghadiali SN. Multi-scale finite element modeling of Eustachian  
391 tube function: influence of mucosal adhesion. *Int J Numer Method Biomed Eng*  
392 2016;**32**(12)
- 393 32 Fichera L, Dillon NP, Zhang D, Godage IS, Siebold MA, Hartley BI, et al. Through the  
394 Eustachian Tube and Beyond: A New Miniature Robotic Endoscope to See Into The  
395 Middle Ear. *IEEE Robot Autom Lett* 2017;**2**(3):1488-94
- 396 33 Handzel O, Poe D, Marchbanks RJ. Synchronous endoscopy and sonotubometry of the  
397 eustachian tube: a pilot study. *Otol Neurotol* 2012;**33**(2):184-91
- 398 34 Bowles PF, Agrawal S, Salam MA. Balloon tuboplasty in patients with Eustachian tube  
399 dysfunction: A prospective study in 39 patients (55 ears). *Clinical otolaryngology :*  
400 *official journal of ENT-UK ; official journal of Netherlands Society for Oto-Rhino-*  
401 *Laryngology & Cervico-Facial Surgery* 2016
- 402 35 Dai S, Guan GF, Jia J, Li H, Sang Y, Chang D, et al. Clinical evaluation of balloon dilation  
403 eustachian tuboplasty surgery in adult otitis media with effusion. *Acta Otolaryngol*  
404 2016;**136**(8):764-7

- 405 36 Poe DS, Silvola J, Pyykkö I. Balloon Dilation of the Cartilaginous Eustachian Tube.  
406 *Otolaryngology–Head and Neck Surgery* 2011;**144**(4):563-9
- 407 37 Ho AC, Chan JY, Ng RW, Ho WK, Wei WI. Stenting of the eustachian tube to prevent  
408 otitis media with effusion after maxillary swing approach nasopharyngectomy.  
409 *Laryngoscope* 2014;**124**(1):139-44
- 410 38 Pohl F, Schuon RA, Miller F, Kampmann A, Bultmann E, Hartmann C, et al. Stenting the  
411 Eustachian tube to treat chronic otitis media - a feasibility study in sheep. *Head Face Med*  
412 2018;**14**(1):8
- 413 39 Dorrance GM. The Repair of Cleft Palate: Concerning the Palatine Insertion of the  
414 Superior Constrictor Muscle of the Pharynx and its Significance in Cleft Palate; with  
415 Remarks on the "Push-Back Operation". *Ann Surg* 1932;**95**(5):641-58
- 416 40 Hemprich A, Frerich B, Hierl T, Dannhauer KH. The functionally based Leipzig  
417 concept for the treatment of patients with cleft lip, alveolus and palate. *J*  
418 *Craniomaxillofac Surg* 2006;**34 Suppl 2**:22-5
- 419 41 Honjo I, Ushiro K, Haji T, Nozoe T, Matsui H. Role Of The Tensor Tympani Muscle In  
420 Eustachian Tube Function. *Acta Otolaryngol* 1983;**95**:4
- 421 42 Takagi A, Sando I, Takahashi H. Computer-aided three-dimensional reconstruction  
422 and measurement of semicircular canals and their cristae in man. *Acta Otolaryngol*  
423 1989;**107**(5-6):362-5
- 424 43 Miller F, Burghard A, Salcher R, Scheper V, Leibold W, Lenarz T, et al. Treatment of  
425 middle ear ventilation disorders: sheep as animal model for stenting the human  
426 Eustachian tube--a cadaver study. *PLoS One* 2014;**9**(11):e113906
- 427 44 Graves GO, Edwards LF. The Eustachian tube: a review of its descriptive, microscopic,  
428 topographic and clinical anatomy. *Archives of Otolaryngology* 1944;**39**(5):359-97
- 429 45 Sando I, Takahashi H, Aoki H, Matsune S. Mucosal folds in human eustachian tube: a  
430 hypothesis regarding functional localization in the tube. *Ann Otol Rhinol Laryngol*  
431 1993;**102**(1 Pt 1):47-51
- 432 46 Ishijima K, Sando I, Balaban CD, Miura M, Takasaki K. Functional anatomy of levator  
433 veli palatini muscle and tensor veli palatini muscle in association with eustachian tube  
434 cartilage. *Ann Otol Rhinol Laryngol* 2002;**111**(6):530-6
- 435 47 Alper CM, Swarts JD, Singla A, Banks J, Doyle WJ. Relationship between the  
436 electromyographic activity of the paratubal muscles and eustachian tube opening

**3D Eustachian Tube**, Schuon R., et al.,

- 437 assessed by sonotubometry and videoendoscopy. *Archives of otolaryngology--head &*  
438 *neck surgery* 2012;**138**(8):741-6
- 439 48 Poe DS, Pyykko I, Valtonen H, Silvola J. Analysis of eustachian tube function by video  
440 endoscopy. *Am J Otol* 2000;**21**(5):602-7
- 441 49 Matsune S, Sando I, Takahashi H. Distributions of eustachian tube goblet cells and  
442 glands in children with and without otitis media. *Ann Otol Rhinol Laryngol*  
443 1992;**101**(9):750-4
- 444 50 Cinamon U. Passive and dynamic properties of the eustachian tube: quantitative  
445 studies in a model. *Otol Neurotol* 2004;**25**(6):1031-3
- 446 51 Ingber DE. Tensegrity and mechanotransduction. *J Bodyw Mov Ther* 2008;**12**(3):198-  
447 200
- 448

449 Figures:

450 FIG. 1: Generation of the 3D model

451 From the embedded block to a coherent stack of sections. The block with the embedded tube  
452 was cut into two halves. Grooves A to C and cannulas 1 to 3 were used to facilitate  
453 orientation after sectioning. The positions of the cannulas are indicated by dotted lines in the  
454 volume of the acrylate block (a).

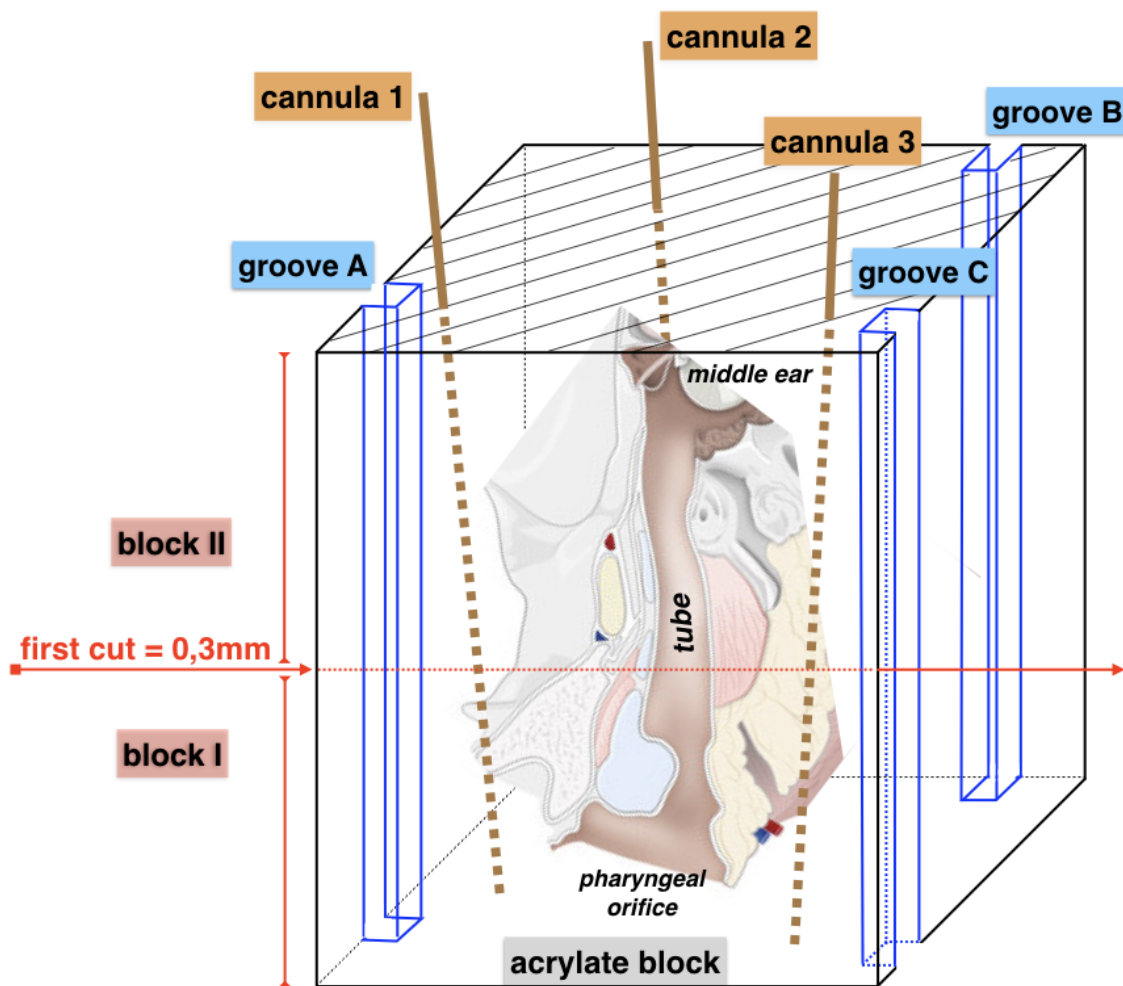

455  
456 a)  
457

**3D Eustachian Tube**, Schuon R., et al.,

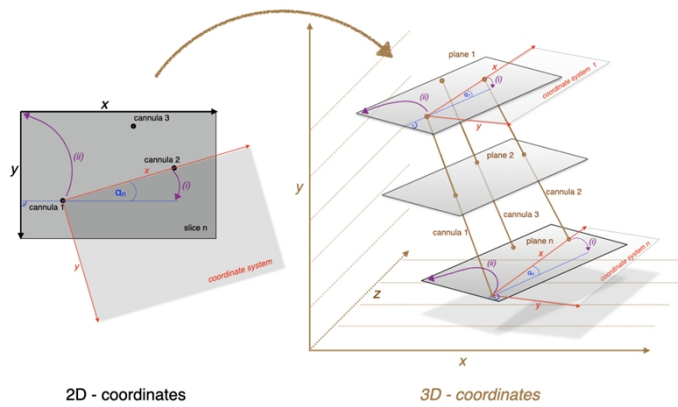

458  
459  
460  
461

Decisive for the creation of a valid volume data set is the axially correct alignment of the digitized sections one after the other: adjustment and stacking of the different sections according to position of the cannulas. (b).



462 FIG. 2.

463 Three-dimensional model. The different sections of the ET are combined to form a 3D  
464 representation of the ET (top). Bottom: Examples of individual sections from the different  
465 parts of the ET.

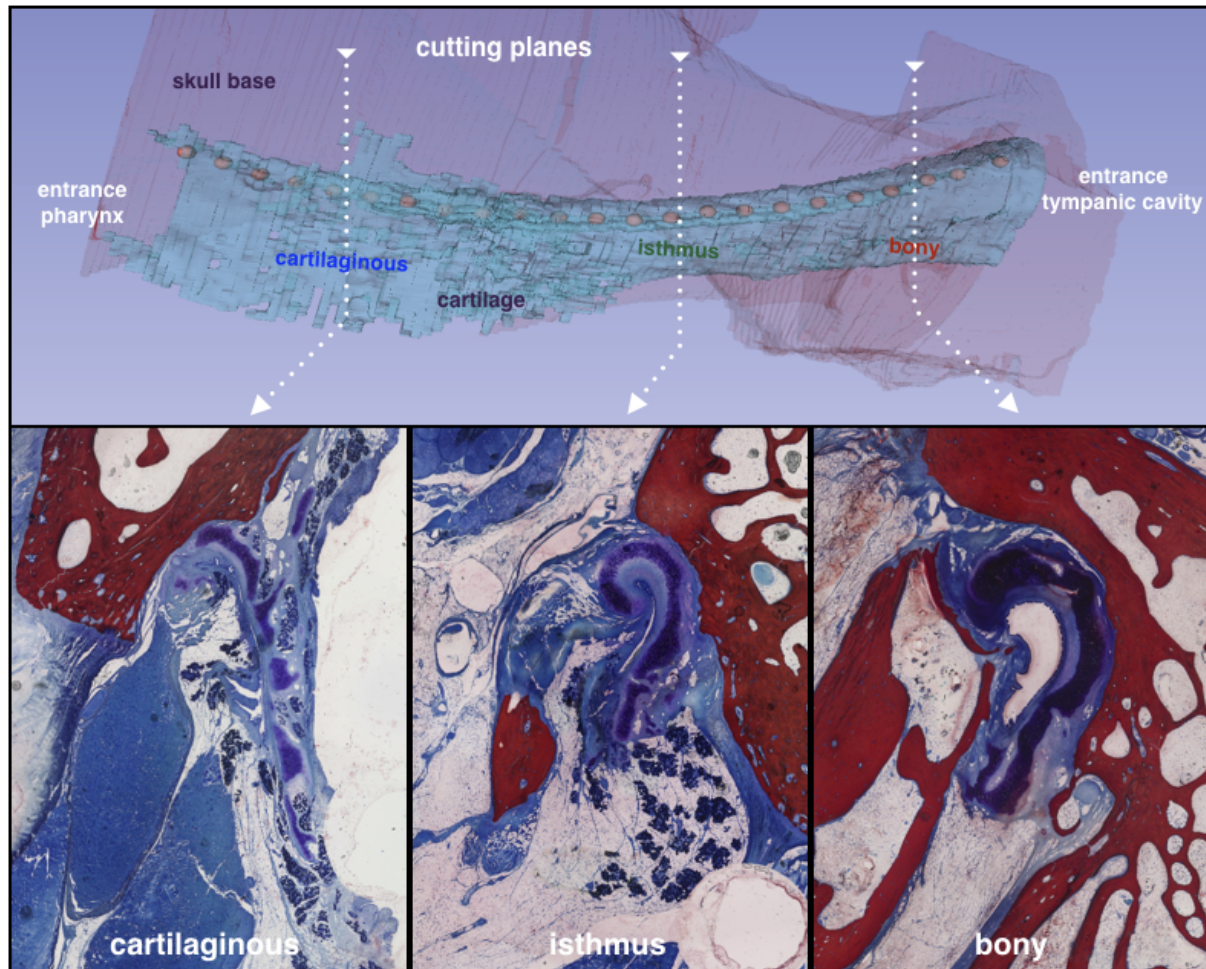

466

**3D Eustachian Tube**, Schuon R., et al.,

467 FIG. 3:

468 Compound model of the ET from lateral side (a) and isolated compartments (b) in correlation

469 to the bony skull base (red). From left: cartilage (petrol), ET lumen (yellow), TVPM (dark

470 blue), LVPM (light blue), OFP (green).

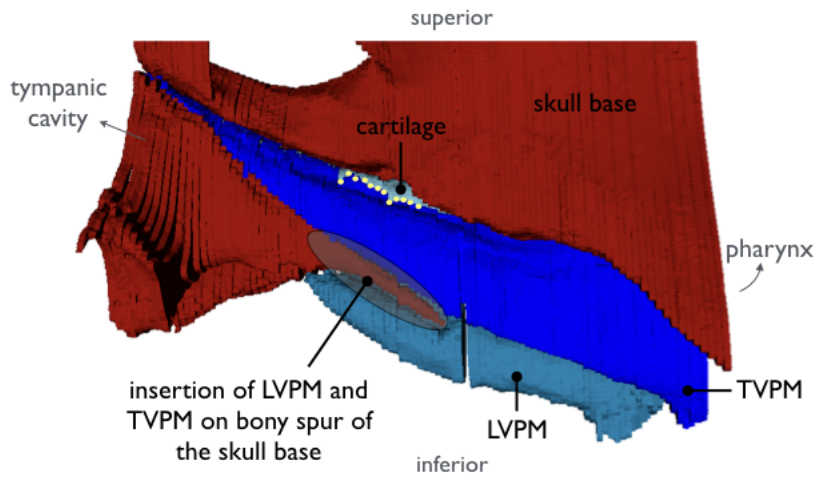

**a**

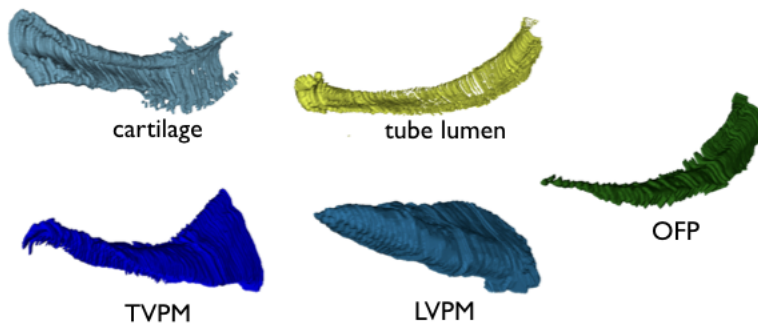

**b**

471

472

473

**3D Eustachian Tube**, Schuon R., et al.,

474 FIG. 4:

475 Fusion of the histologic 3D model and the CBCT. Note the marking cannulas for reference in  
476 the reconstruction (top right) with superimposed tubal cartilage (petrol). The three multiplanar  
477 para-planes with superimposed histological section (colored) into the CBCT (grey) come  
478 from the upper left (coronary, corresponding histologic section – plane of segmentation: red:  
479 bone, blue: soft tissue) over lower left and lower right (sagittal and axial, with reconstructed  
480 histological section: slice thickness in the form of jumps). Red arrow: corresponding bony  
481 process of the skull base. Green arrow: cartilage of the ET.

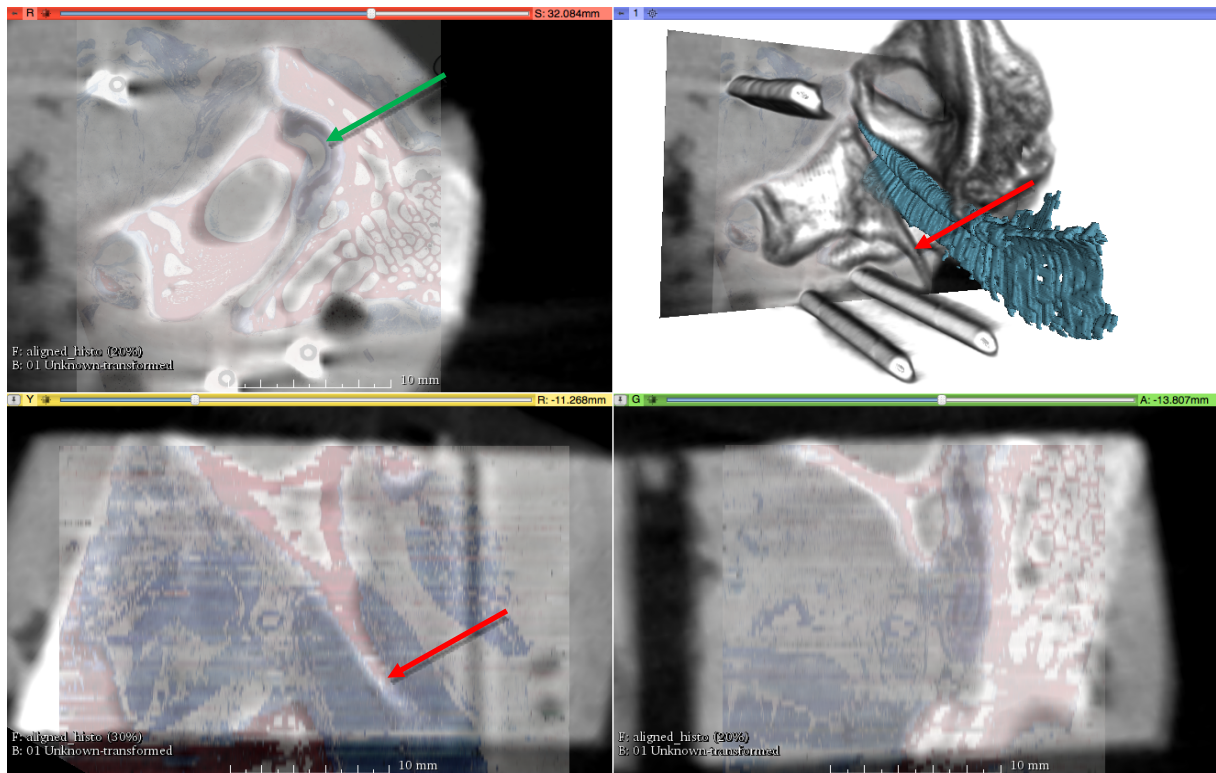

482

483

484 FIG. 5:  
485 The plots show the quantitative analysis as a function of the position in the ET axis with  
486 respect to area and circumference for the individual entities cartilage, lumen, OFP, TVPM and  
487 LVPM (a).

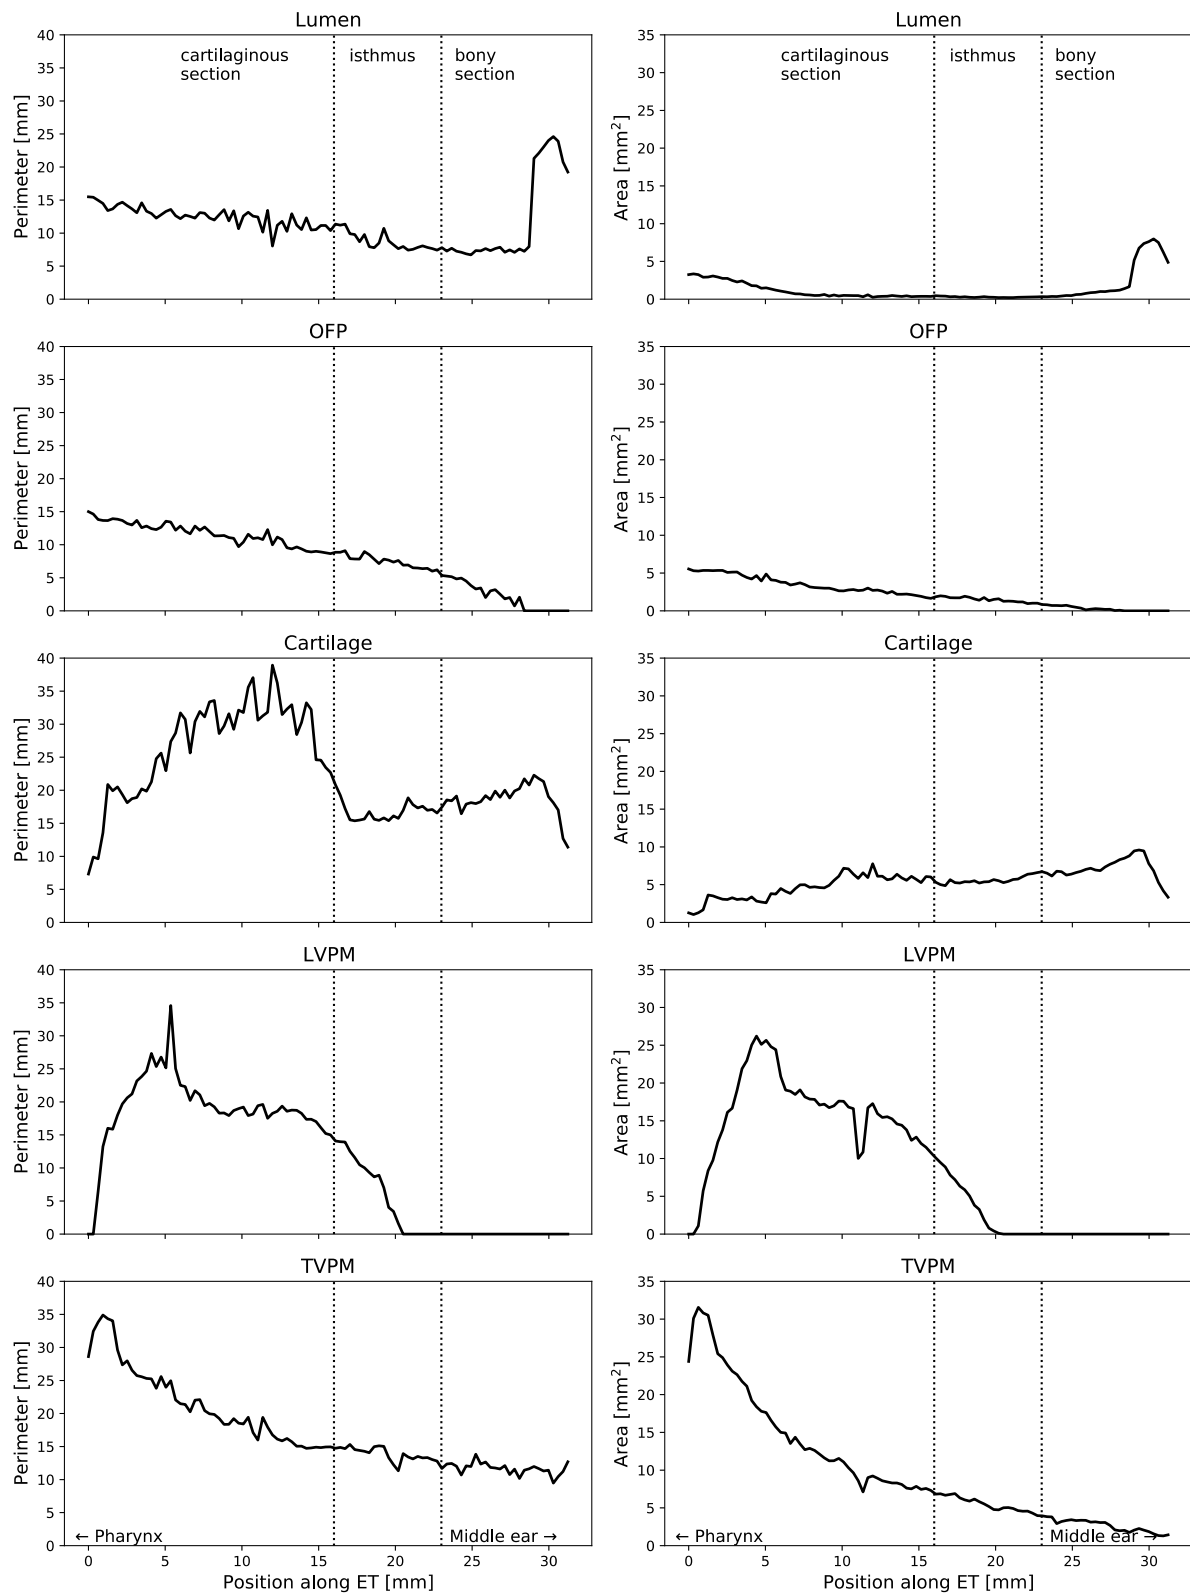

489 FIG. 6:

490 View from above on a right ET, pharyngeal orifice below. Relation of the tubal cartilage and  
491 the course of the LVPM. By the elevation of the soft palate by yawning and swallowing the  
492 muscle slides in the cartilage, initially from the pharyngeal opening to the upper third of the  
493 cartilage. Together with the upper-outward rotation with additional opening momentum by  
494 the force of the TVPM, the opening of the ET is initiated.

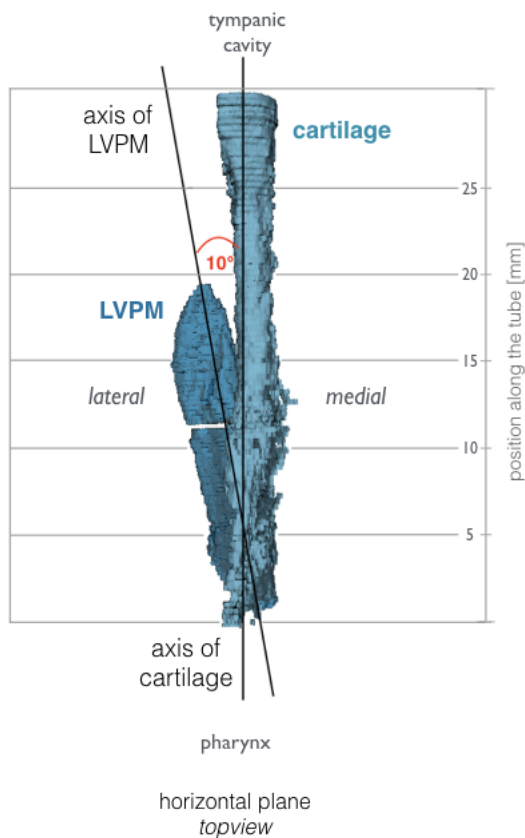

495

496



497 FIG. 7:

498 ET-cartilage shows a spiraled conformation in the direction of its axis. The caudal edge of the  
499 cartilage turns medially in the direction from nasopharynx (a) over midportion (b) to middle  
500 ear (c) (angle of approximately 38°). Note the circle in b) corresponding to the needle in this  
501 section.

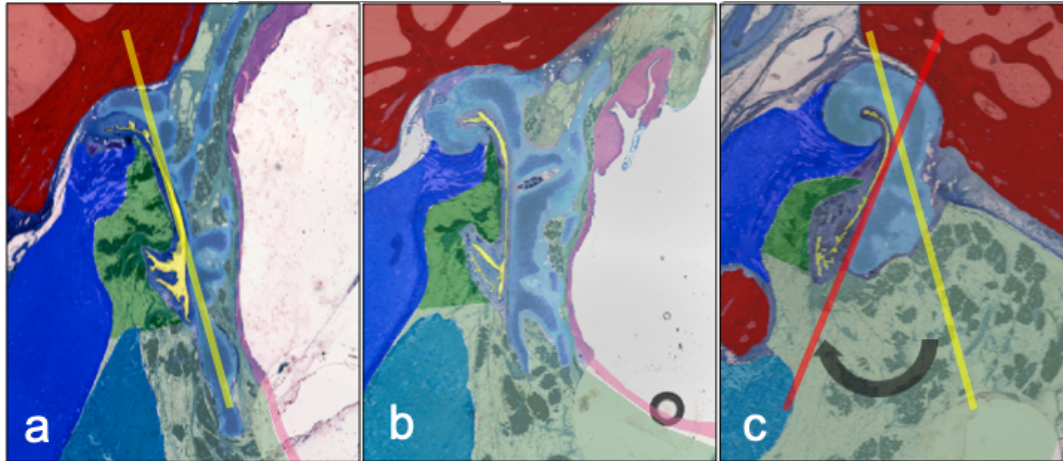

502

503
